# Supplementary material for: Neural-Induced Human Adipose Tissue-Derived Stem Cells Conditioned Medium Ameliorates Rotenone-Induced Toxicity in SH-SY5Y Cells
Source: PubMed Central journal article supplement (PMC7956615; doi:10.3390/ijms22052322), 2021-02-26
Supplement: ijms-22-02322-s001.pdf [file ijms-22-02322-s001.pdf]

Supplementary materials to

**Neural-Induced Human Adipose Tissue-Derived Stem Cells  
Conditioned Medium Ameliorates Rotenone-Induced Toxicity  
in SH-SY5Y Cells**

**Mahesh Ramalingam, Sujeong Jang, and Han-Seong Jeong**

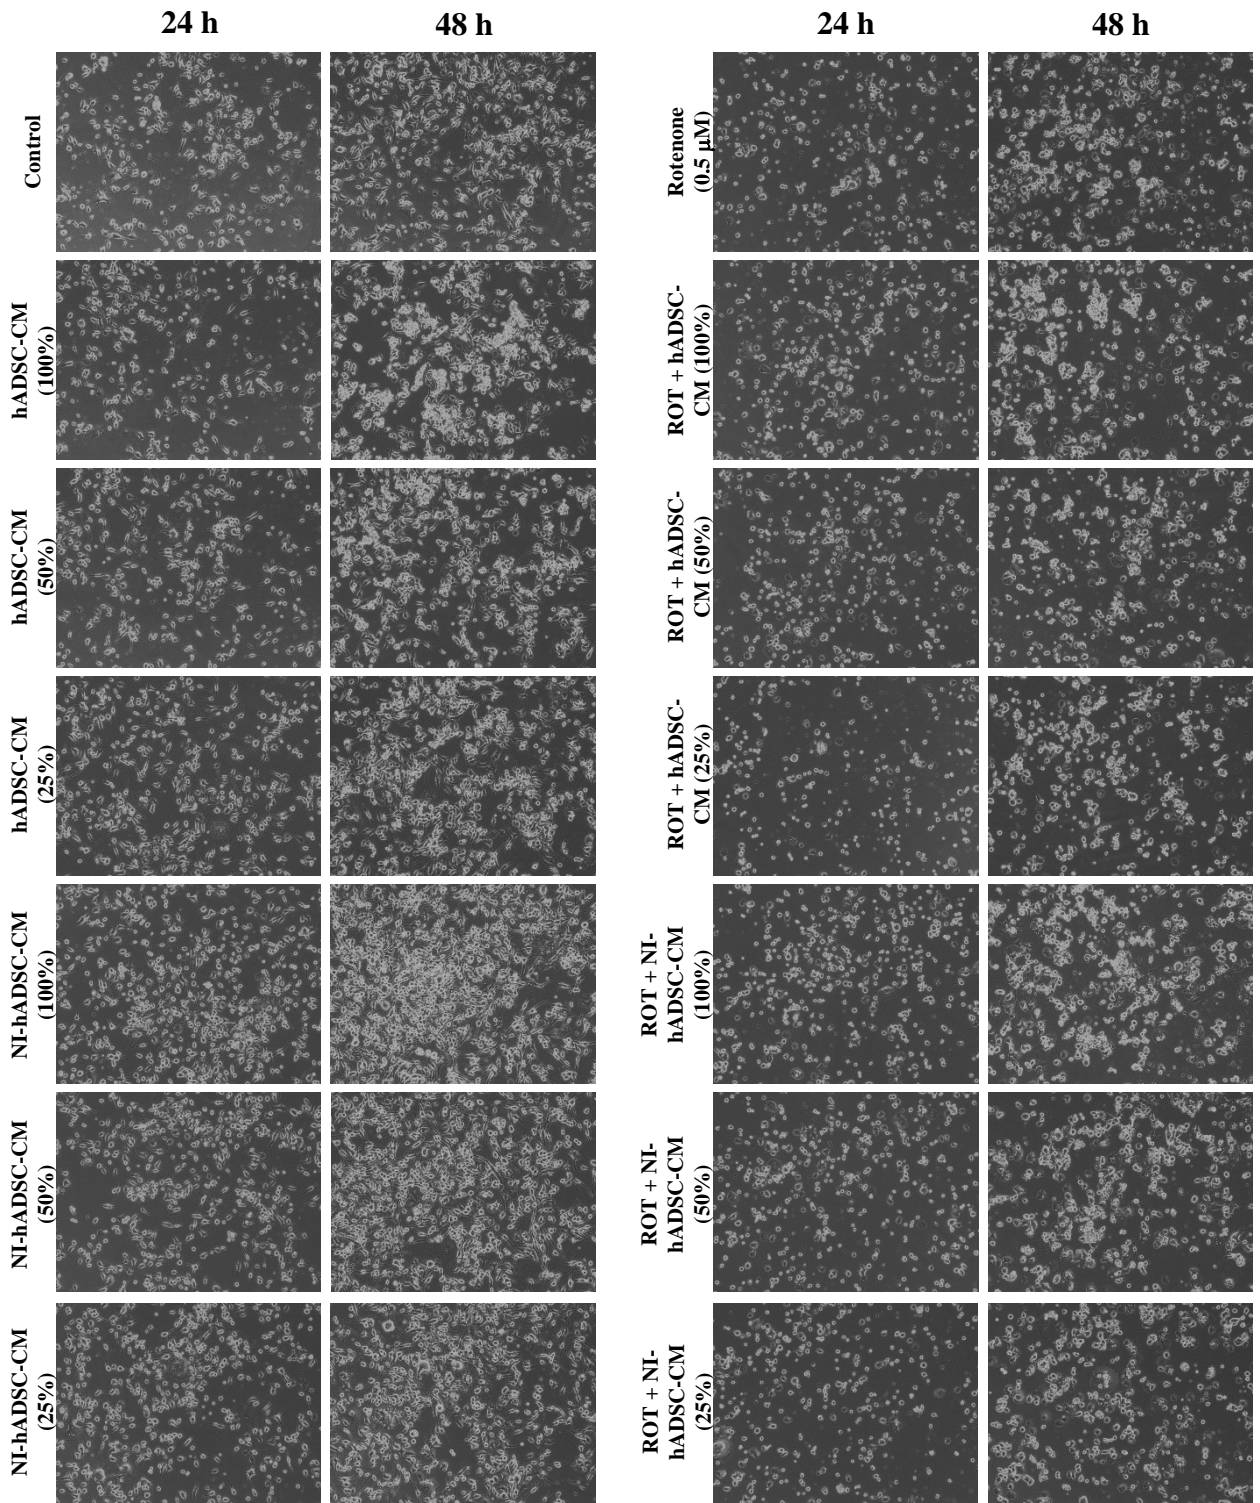

**Supplementary Figure 1.** SH-SY5Y cells were seeded as  $5 \times 10^4$  cells/ml of DMEM containing 1% FBS and used for experiments after overnight incubation. Cells incubated with the absence or presence of ROT (0.5  $\mu$ M) for 48 h were treated with hADSC-CM or NI-hADSC-CM at 100 or 50 or 25% during the last 24 h and assessed for morphological changes. Each picture is a representative of three independent experiments.

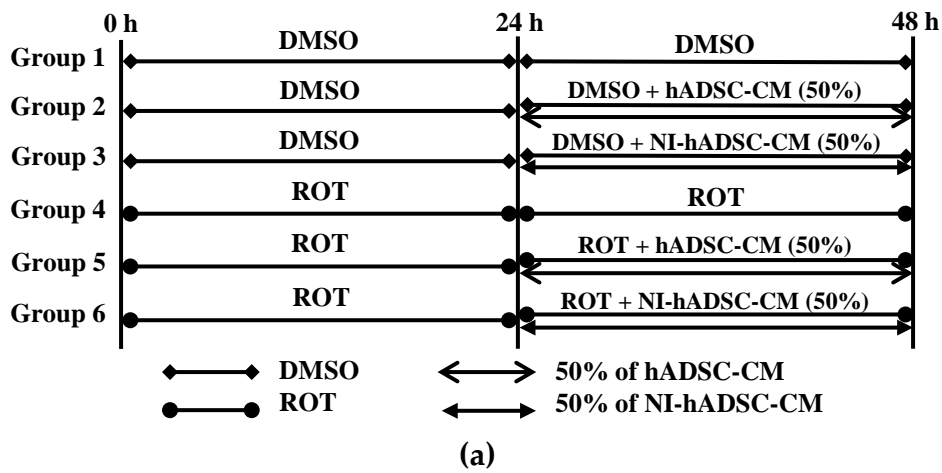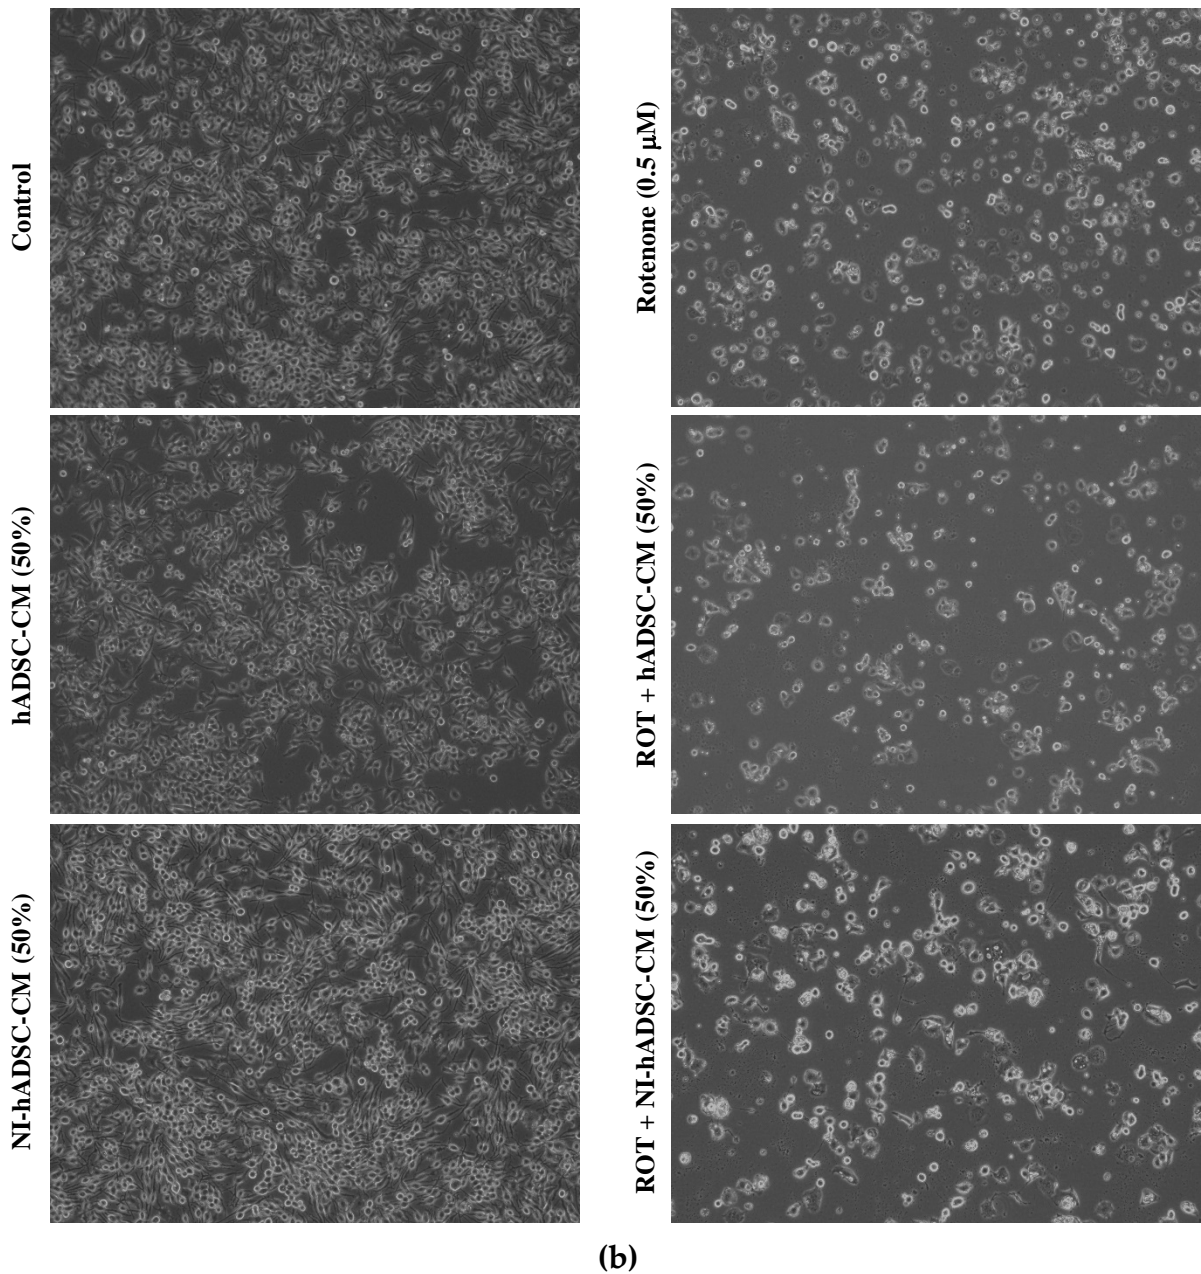

**Supplementary Figure 2.** (a) The experimental study plan. (b) SH-SY5Y cells were seeded as  $5 \times 10^4$  cells/ml of DMEM containing 1% FBS and used for experiments after overnight incubation. Cells incubated with the absence or presence of ROT (0.5  $\mu$ M) for 48 h were treated with hADSC-CM (50%) or NI-hADSC-CM (50%) during the last 24 h and assessed for morphological changes. Images are representative of three independent experiments.

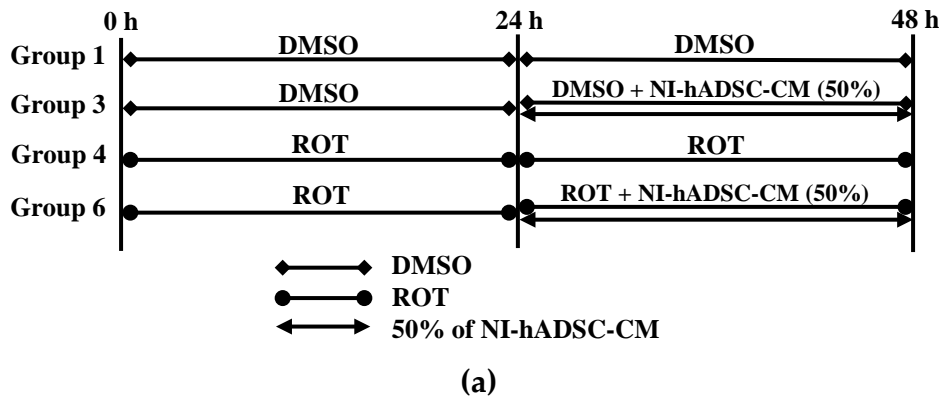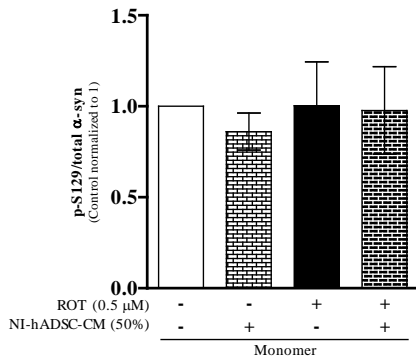

(b)

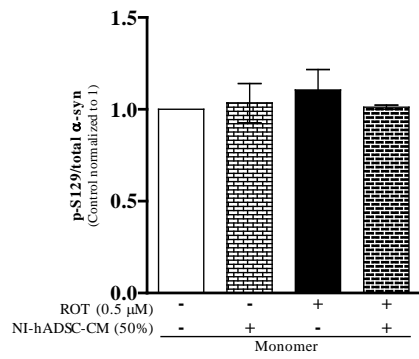

(c)

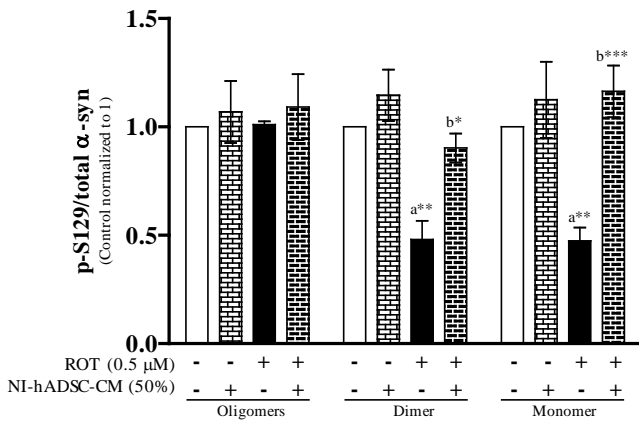

(d)

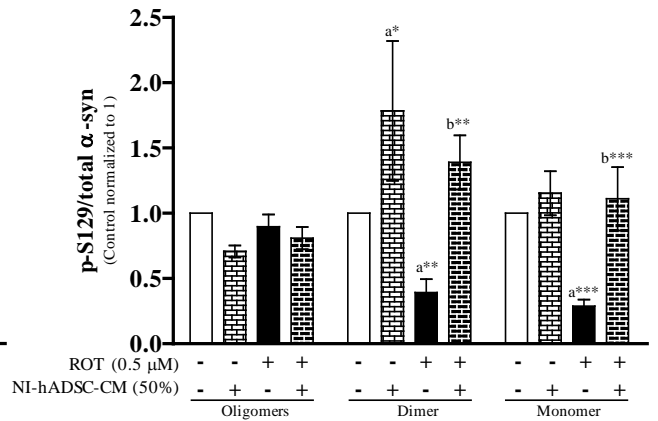

(e)

**Supplementary Figure 3.** The experimental study plan for Triton X-100-soluble and -insoluble fractionation and Western blotting (a). SH-SY5Y cells were seeded as  $5 \times 10^4$  cells/ml of DMEM containing 1% FBS and used for experiments after overnight incubation. Cells with absence or presence of ROT (0.5  $\mu$ M) for 48 h were treated with hADSC-CM (50%) or NI-hADSC-CM (50%) during the last 24 h and analyzed by Western blotting. Bar graphs represent fold changes in monomeric p-S129/total  $\alpha$ -syn ratios from SDS-PAGE gels of 12% (b) or 8% (c) in Triton X-100-soluble fraction. The oligomeric, dimeric and monomeric S129/total  $\alpha$ -syn ratios from SDS-PAGE gels of 12% (d) or 8% (e) in Triton X-100-insoluble fraction. Data are mean  $\pm$  SEM of three independent experiments and analyzed by one-way of variance (ANOVA) followed by Tukey's *post hoc* test. Statistical significance: <sup>a</sup>-compared with control; <sup>b</sup>-compared with ROT; \* $p < 0.05$  and \*\*\* $p < 0.001$ .

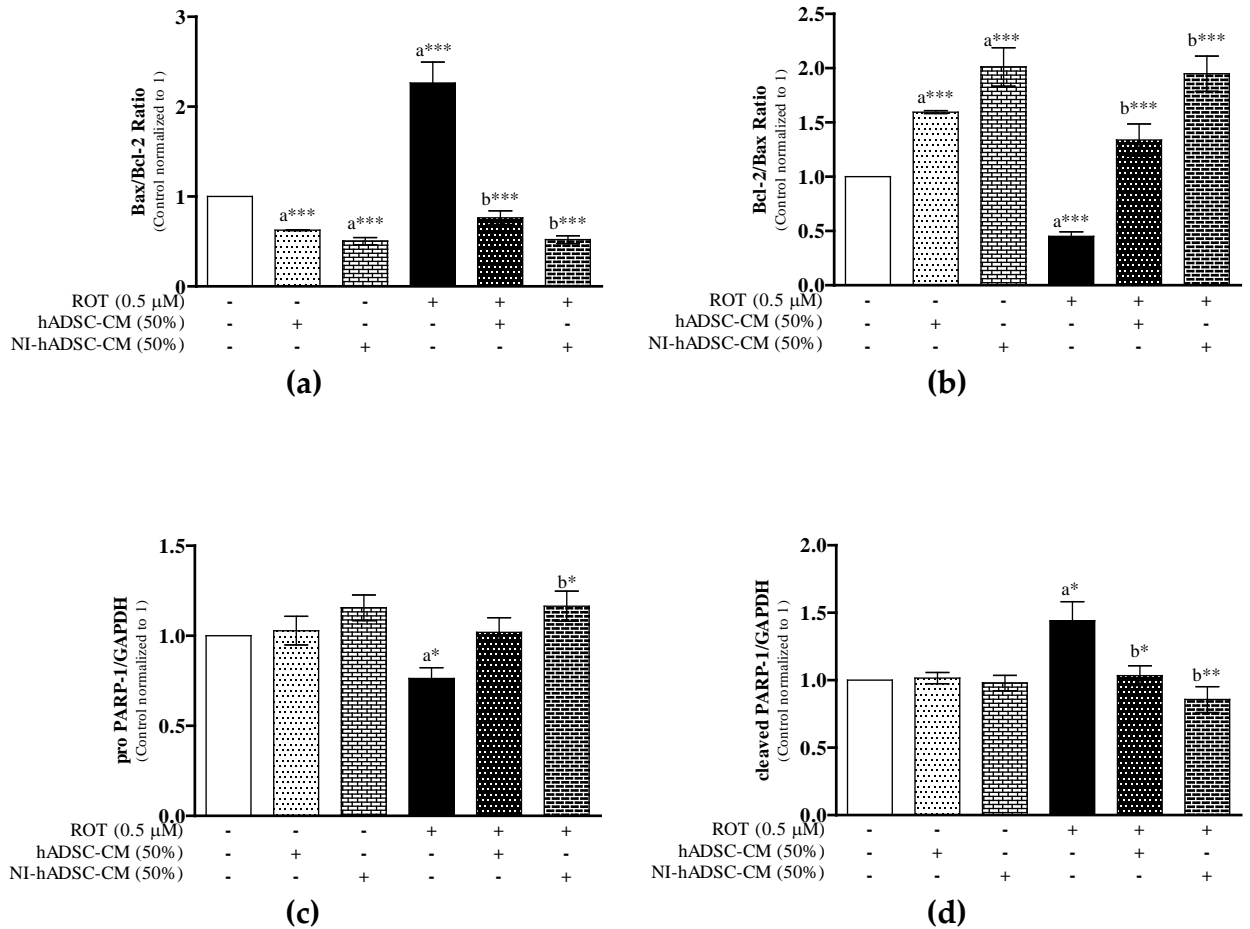

**Supplementary Figure 4.** SH-SY5Y cells were seeded as  $5 \times 10^4$  cells/ml of DMEM containing 1% FBS and used for experiments after overnight incubation. Cells with absence or presence of ROT (0.5  $\mu$ M) for 48 h were treated with hADSC-CM (50%) or NI-hADSC-CM (50%) during the last 24 h and analyzed by Western blotting. The bar graphs represents for Bax/Bcl-1 ratio (a), Bcl-2/Bax ratio (b), pro-PARP-1/GAPDH (c) and cleaved PARP-1/GAPDH ratio (d). Images are representative of three independent experiments. Data are mean  $\pm$  SEM of three independent experiments and analyzed by one-way of variance (ANOVA) followed by Tukey's *post hoc* test. Statistical significance: <sup>a</sup>-compared with control; <sup>b</sup>-compared with ROT; \* $p < 0.05$ , \*\* $p < 0.01$  and \*\*\* $p < 0.001$ .

**Supplementary Table 1.** Western blotting conditions and antibodies used in this study.

**Western blotting conditions:**

SDS-PAGE Gel Percentages

- 8% = TH, p-S129  $\alpha$ -syn, total  $\alpha$ -syn, NF-H, PARP  
 12% = p-S129  $\alpha$ -syn, total  $\alpha$ -syn,  $\beta$ 3-tubulin, NeuN, SYP  
 13 or 14% = Syn211, Bax, Bcl-2, Mcl-1, Cyt-c, Cas-9, -3, -7.

SDS-PAGE Gel Running:

80~100 V for 100~120 min

SDS-PAGE Gel Transfer Times to Nitrocellulose Membrane:

- 8% = 250 mA for 90 min  
 12% = 200 mA for 65 min  
 13 or 14% = 200 mA for 60 min

| Antibody Name                        | Host, MW Details                         | Company        | Cat. No.    | Dilution            |
|--------------------------------------|------------------------------------------|----------------|-------------|---------------------|
| <b>Primary Antibodies:</b>           |                                          |                |             |                     |
| Tyrosine hydroxylase                 | Rabbit pAb, 62 kDa                       | Millipore      | AB152       | 1:1,000             |
| $\alpha$ -synuclein clone Syn211     | Mouse mAb, 14 kDa                        | Millipore      | 36-008-25UL | 1:1,000             |
| p-S129 $\alpha$ -synuclein           | Rabbit mAb, 18 kDa                       | Abcam          | ab51253     | 1:1,000             |
| total $\alpha$ -synuclein            | Rabbit mAb, 18 kDa                       | Abcam          | ab212184    | 1:1,000             |
| Neurofilament-H                      | Mouse mAb, 180~200 kDa                   | Cell Signaling | #2836       | 1:1,000             |
| $\beta$ 3-tubulin                    | Rabbit mAb, 55 kDa                       | Cell Signaling | #5568       | 1:1,000             |
| Neuronal Nuclei                      | Mouse mAb, 46~48 kDa                     | Millipore      | MAB377      | 1:1,000             |
| Synaptophysin                        | Mouse mAb, 38~48 kDa                     | Santa Cruz     | sc-17750    | 1:2,000             |
| Bax                                  | Rabbit pAb, 23 kDa                       | Santa Cruz     | sc-493      | 1:500               |
| Bcl-2                                | Rabbit pAb, 26 kDa                       | Santa Cruz     | sc-492      | 1:500               |
| Mcl-1                                | Rabbit mAb, 40 kDa                       | Cell Signaling | #94296      | 1:1,000             |
| Cytochrome c (Cyt-c)                 | Rabbit mAb, 14 kDa                       | Cell Signaling | #11940      | 1:1,000             |
| Caspase-9                            | Mouse mAb,<br>pro=47, cleaved=37,35 kDa  | Cell Signaling | #9508       | 1:1,000             |
| Caspase-3                            | Rabbit mAb,<br>pro=35, cleaved=17,19 kDa | Cell Signaling | #9665       | 1:1,000             |
| Caspase-7                            | Rabbit mAb,<br>Pro=35, cleaved=20 kDa    | Cell Signaling | #12827      | 1:1,000             |
| PARP                                 | Rabbit pAb,<br>Pro=116, cleaved=89 kDa   | Cell Signaling | #9542       | 1:1,000             |
| GAPDH                                | Rabbit pAb, 37 kDa                       | Santa Cruz     | sc-25778    | 1:2,000             |
| $\beta$ -actin                       | Mouse mAb, 43 kDa                        | Santa Cruz     | sc-47778    | 1:2,000             |
| <b>Secondary Antibodies:</b>         |                                          |                |             |                     |
| Anti-rabbit IgG, HRP-linked antibody |                                          | Cell Signaling | #7074       | 1:1,000<br>~1:2,000 |
| Anti-mouse IgG, HRP-linked antibody  |                                          | Cell Signaling | #7076       | 1:1,000<br>~1:2,000 |

pAb, polyclonal antibody; mAb, monoclonal antibody; kDa, kiloDalton.

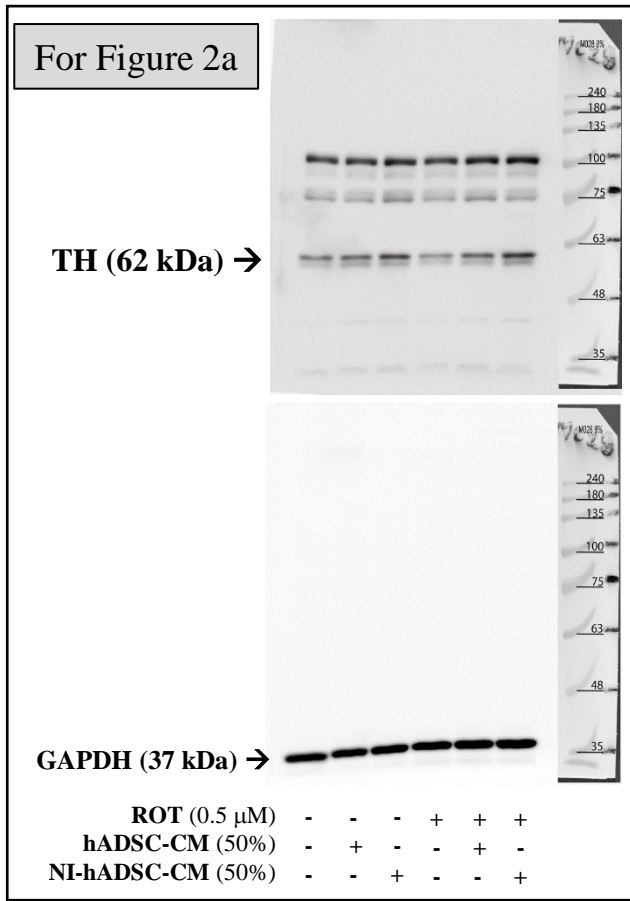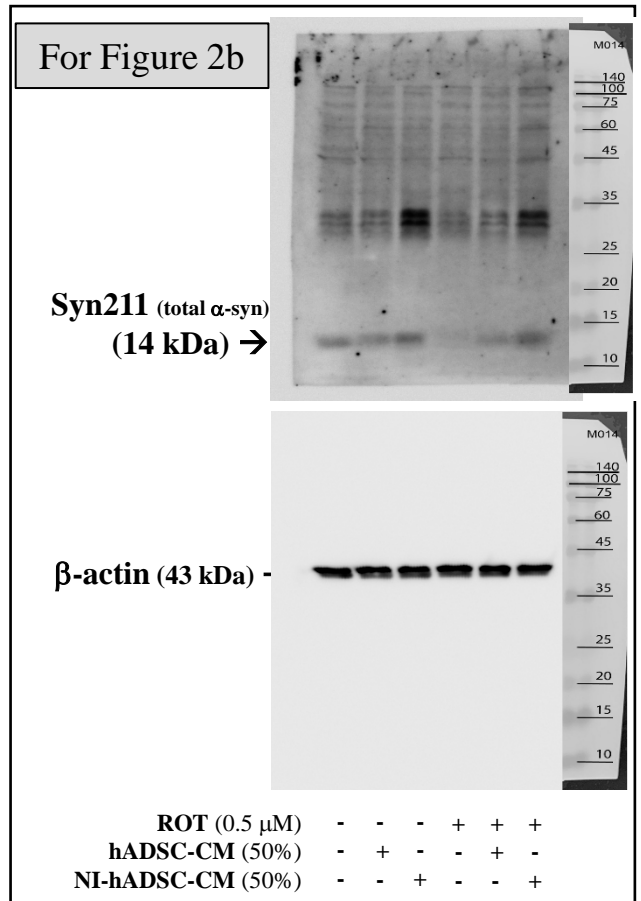

**Supplementary Figure 5.** Unedited images and their molecular weight markers for respective Western blots used in **Figure 2** of this manuscript.

For Figure 3a

1% Triton X-100-soluble fraction  
12% SDS-PAGE gel

1% Triton X-100-soluble fraction  
8% SDS-PAGE gel

p-S129  $\alpha$ -syn

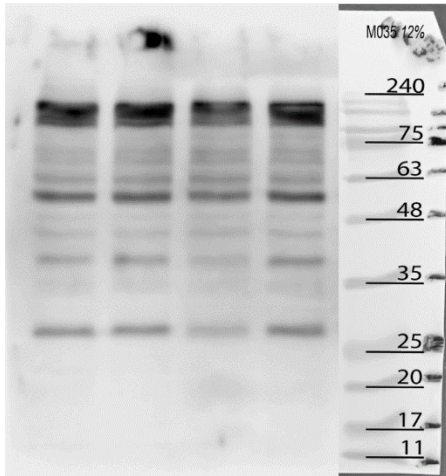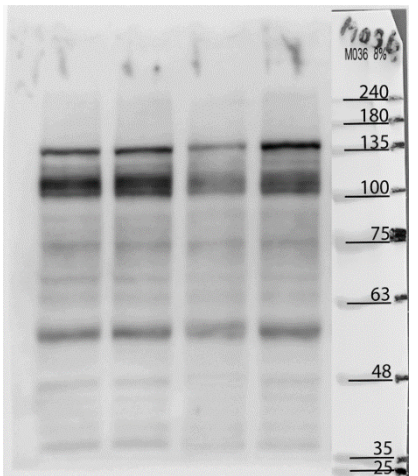

|                   |   |   |   |   |
|-------------------|---|---|---|---|
| ROT (0.5 $\mu$ M) | - | - | + | + |
| NI-hADSC-CM (50%) | - | + | - | + |

|   |   |   |   |
|---|---|---|---|
| - | - | + | + |
| - | + | - | + |

total  $\alpha$ -syn

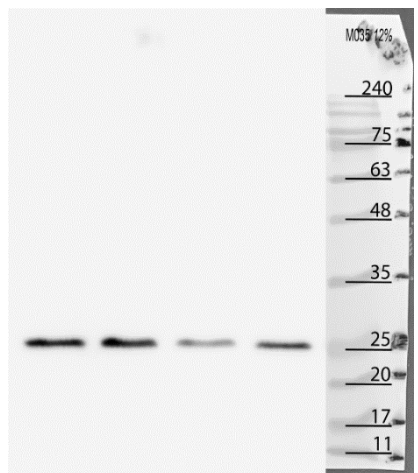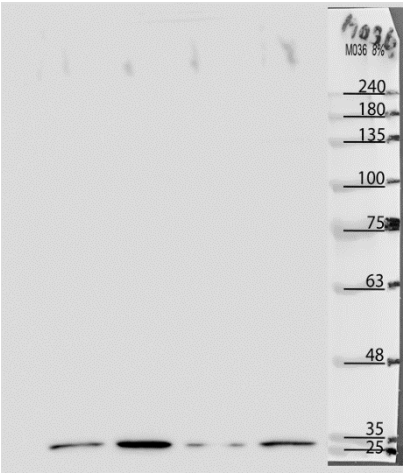

|                   |   |   |   |   |
|-------------------|---|---|---|---|
| ROT (0.5 $\mu$ M) | - | - | + | + |
| NI-hADSC-CM (50%) | - | + | - | + |

|   |   |   |   |
|---|---|---|---|
| - | - | + | + |
| - | + | - | + |

GAPDH (37 kDa)

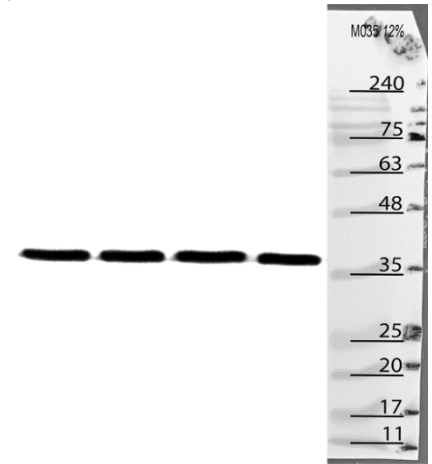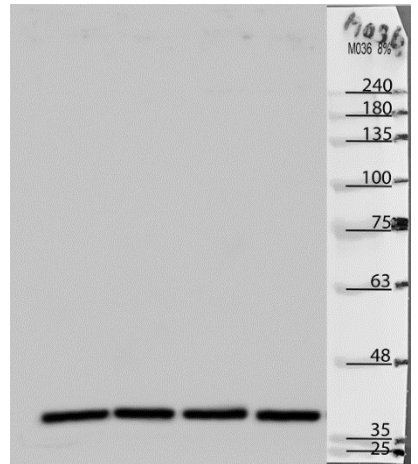

|                   |   |   |   |   |
|-------------------|---|---|---|---|
| ROT (0.5 $\mu$ M) | - | - | + | + |
| NI-hADSC-CM (50%) | - | + | - | + |

|   |   |   |   |
|---|---|---|---|
| - | - | + | + |
| - | + | - | + |

Supplementary Figure 6. Unedited images and their molecular weight markers for respective Western blots used in Figure 3a of this manuscript.



For Figure 4a

Triton X-100-Soluble fraction  
1% Triton X-100-insoluble fraction  
12% SDS-PAGE gel

Triton X-100-Soluble fraction  
1% Triton X-100-insoluble fraction  
8% SDS-PAGE gel

p-S129  $\alpha$ -syn

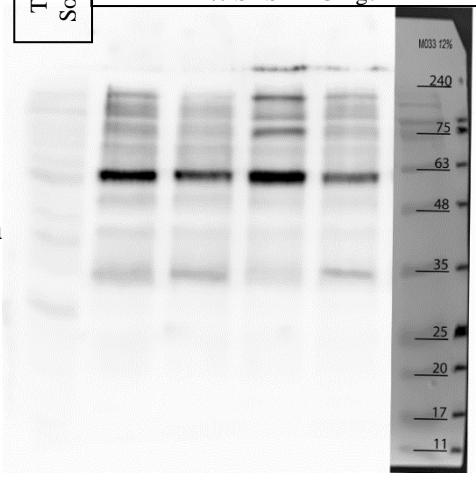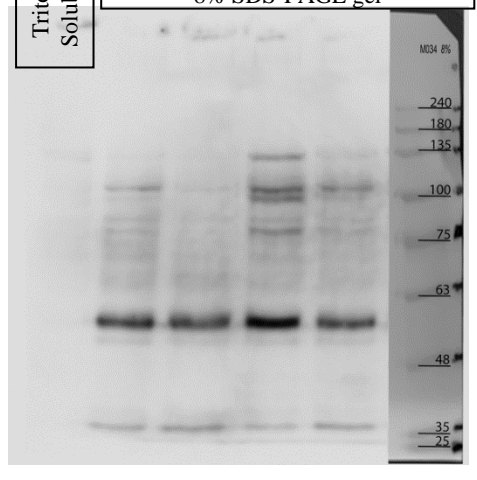

|                   |   |   |   |   |   |
|-------------------|---|---|---|---|---|
| ROT (0.5 $\mu$ M) | - | - | - | + | + |
| NI-hADSC-CM (50%) | - | - | + | - | + |

|   |   |   |   |   |
|---|---|---|---|---|
| - | - | - | + | + |
| - | - | + | - | + |

total  $\alpha$ -syn

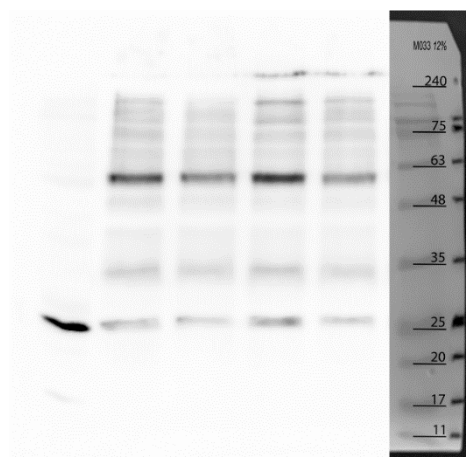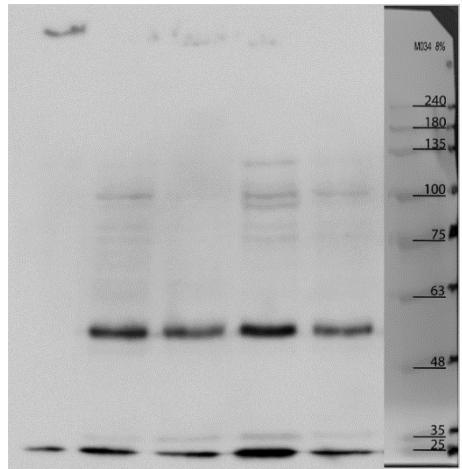

|                   |   |   |   |   |   |
|-------------------|---|---|---|---|---|
| ROT (0.5 $\mu$ M) | - | - | - | + | + |
| NI-hADSC-CM (50%) | - | - | + | - | + |

|   |   |   |   |   |
|---|---|---|---|---|
| - | - | - | + | + |
| - | - | + | - | + |

GAPDH (37 kDa)

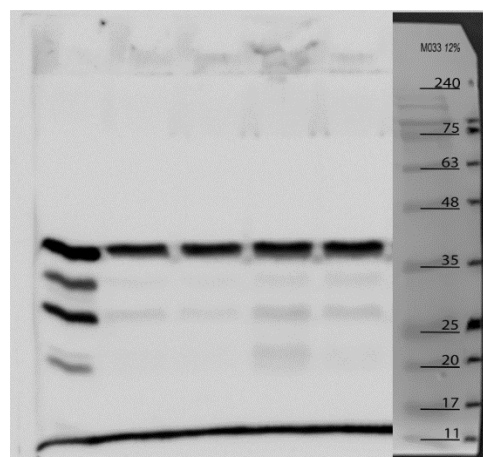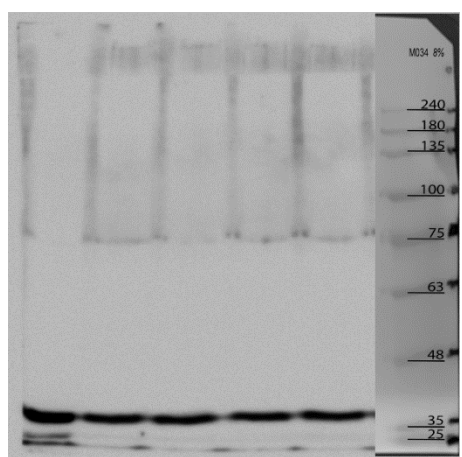

|                   |   |   |   |   |   |
|-------------------|---|---|---|---|---|
| ROT (0.5 $\mu$ M) | - | - | - | + | + |
| NI-hADSC-CM (50%) | - | - | + | - | + |

|   |   |   |   |   |
|---|---|---|---|---|
| - | - | - | + | + |
| - | - | + | - | + |

Supplementary Figure 7. Unedited images and their molecular weight markers for respective Western blots used in Figure 4a of this manuscript.

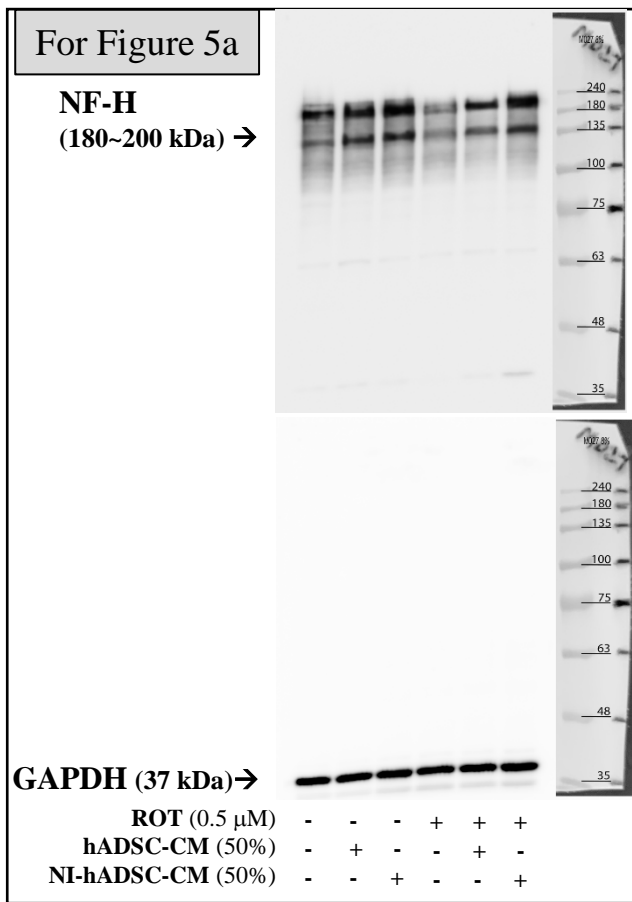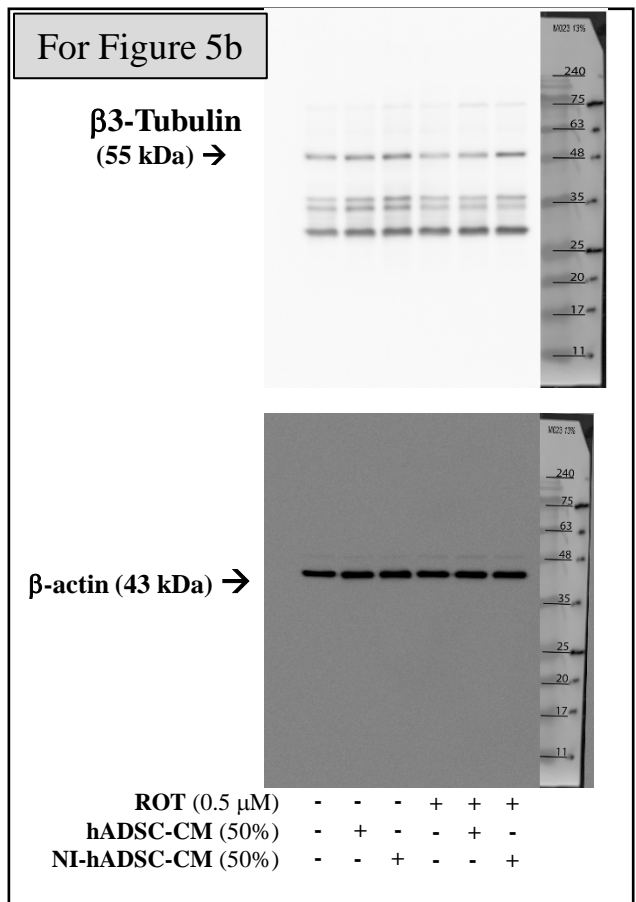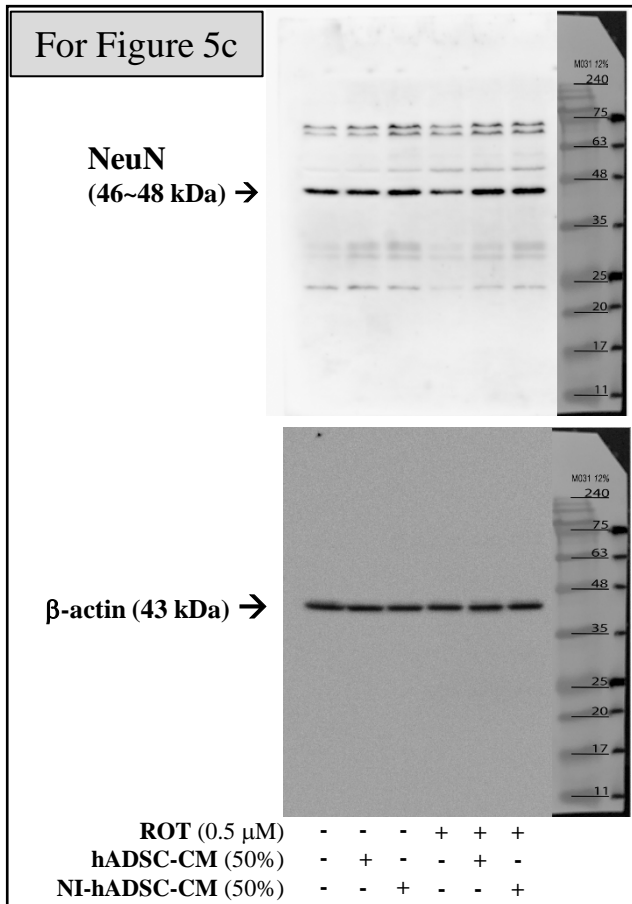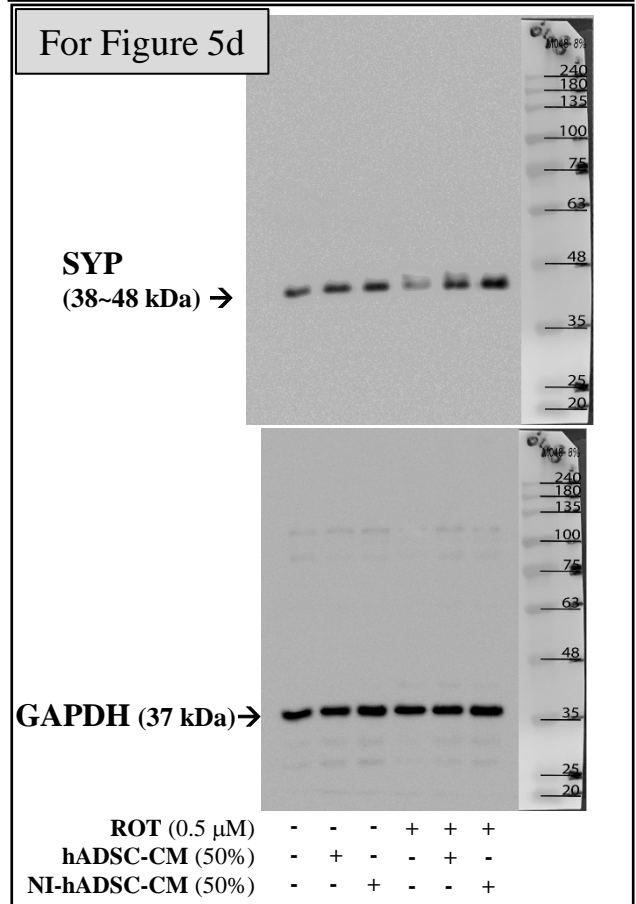

**Supplementary Figure 8.** Unedited images and their molecular weight markers for respective Western blots used in Figure 5 of this manuscript.

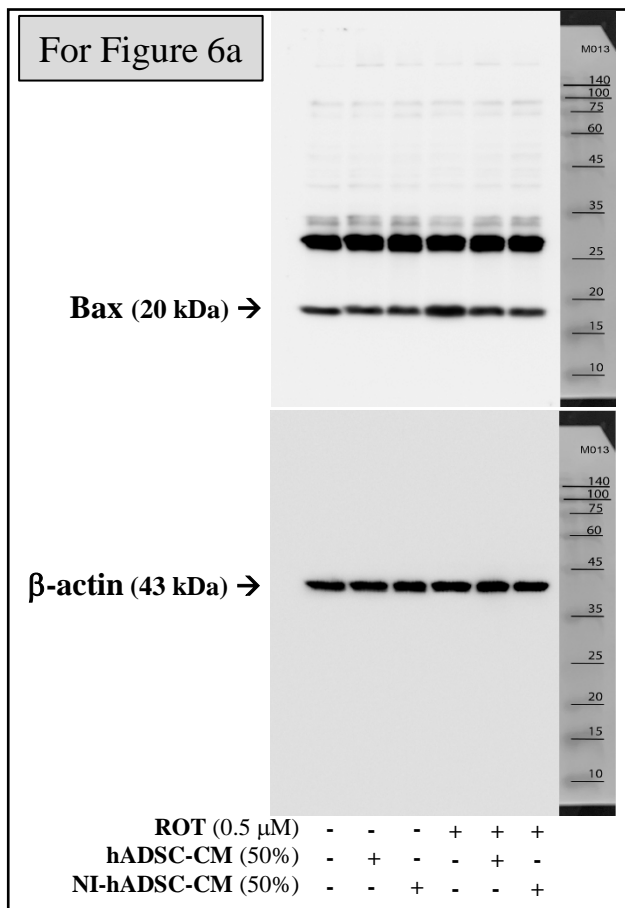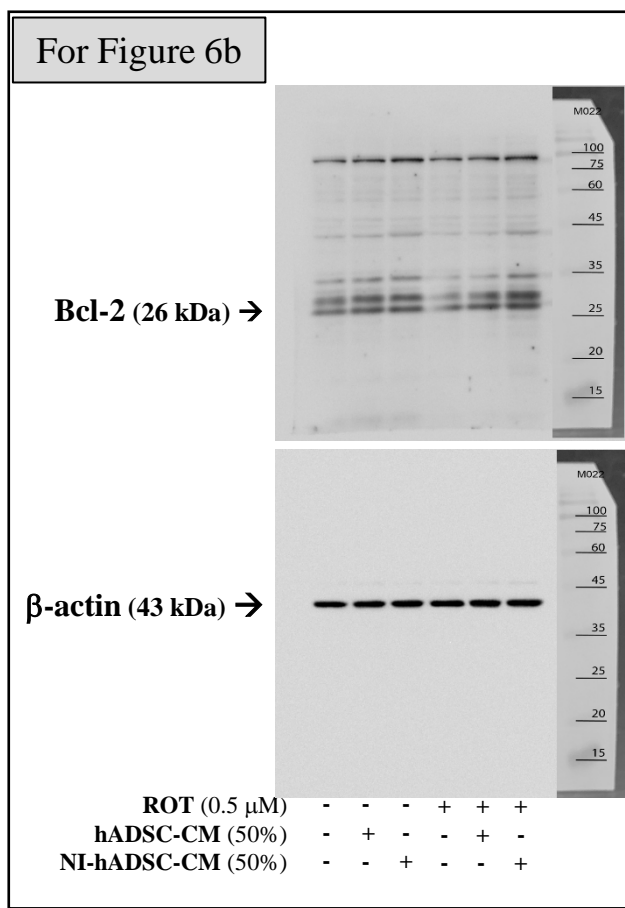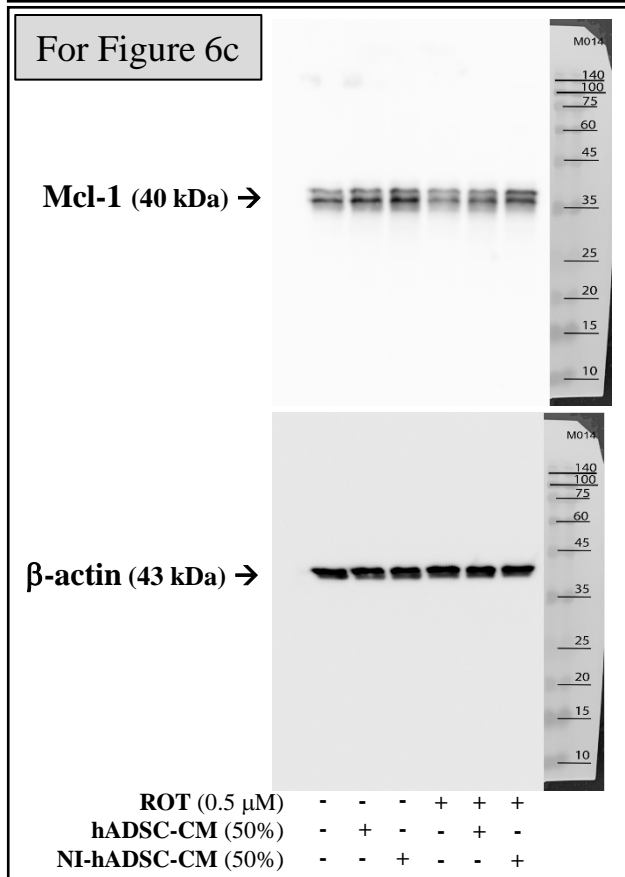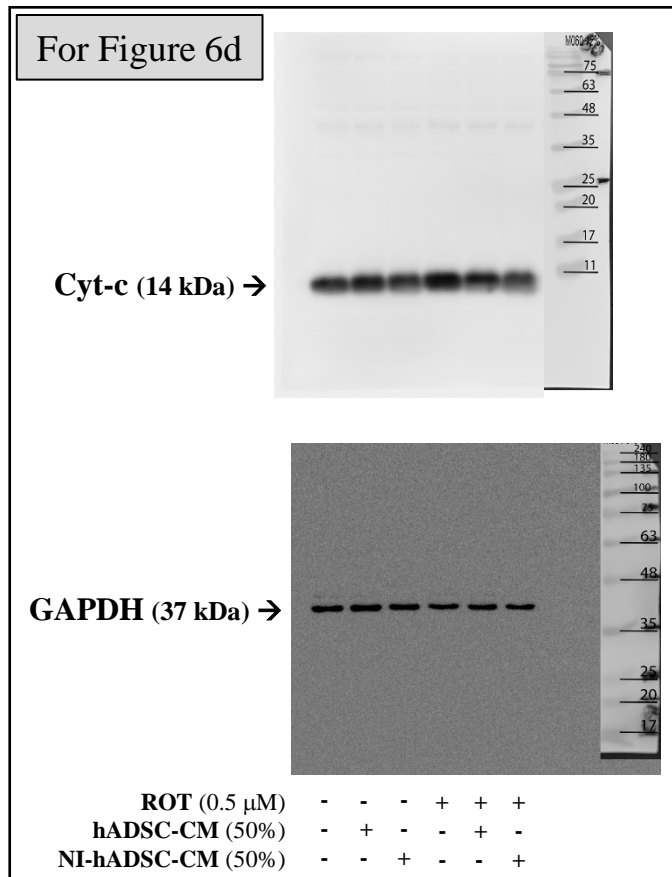

**Supplementary Figure 9.** Unedited images and their molecular weight markers for respective Western blots used in Figure 6 of this manuscript.

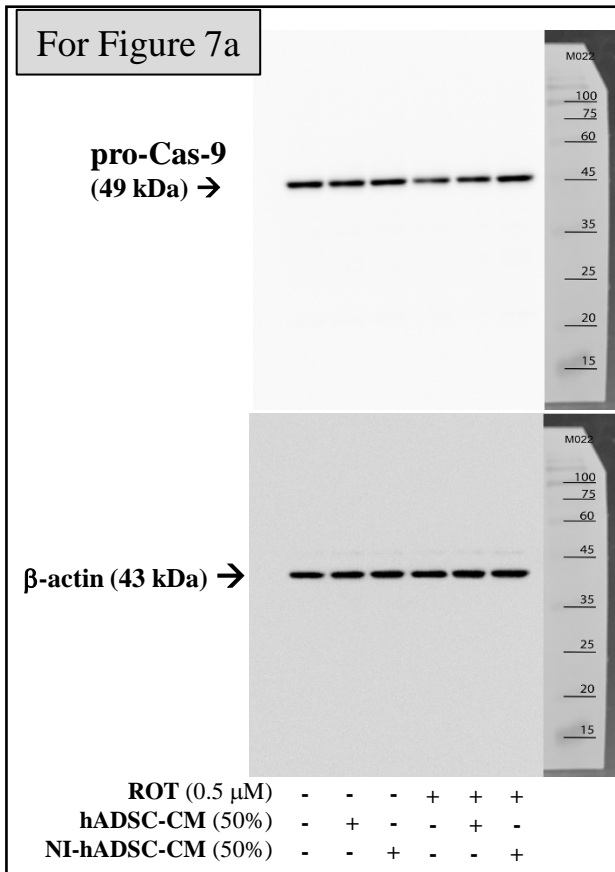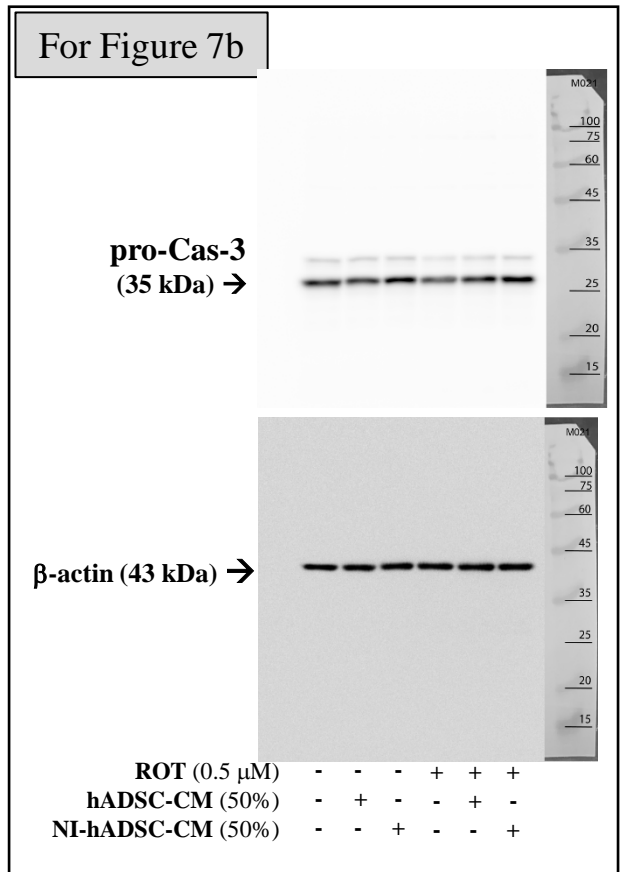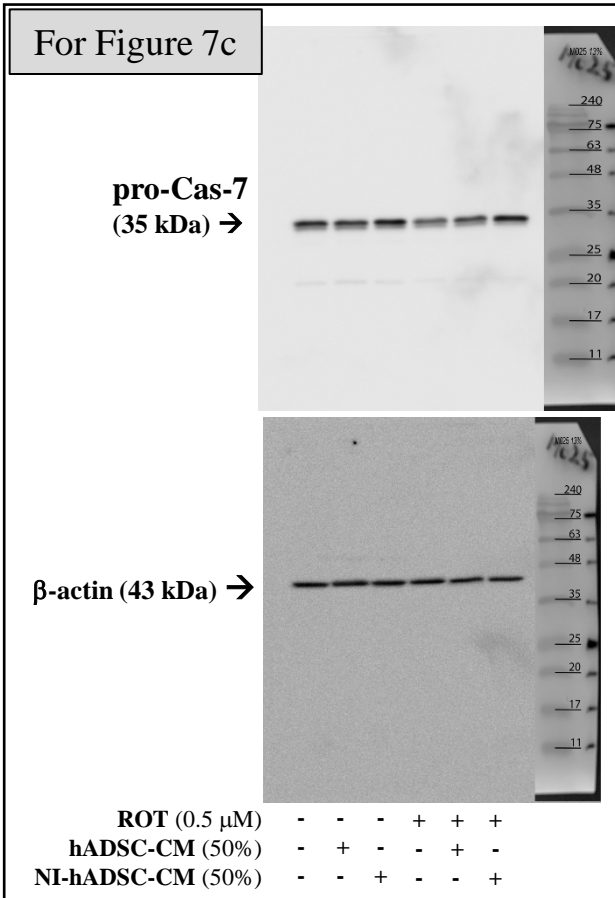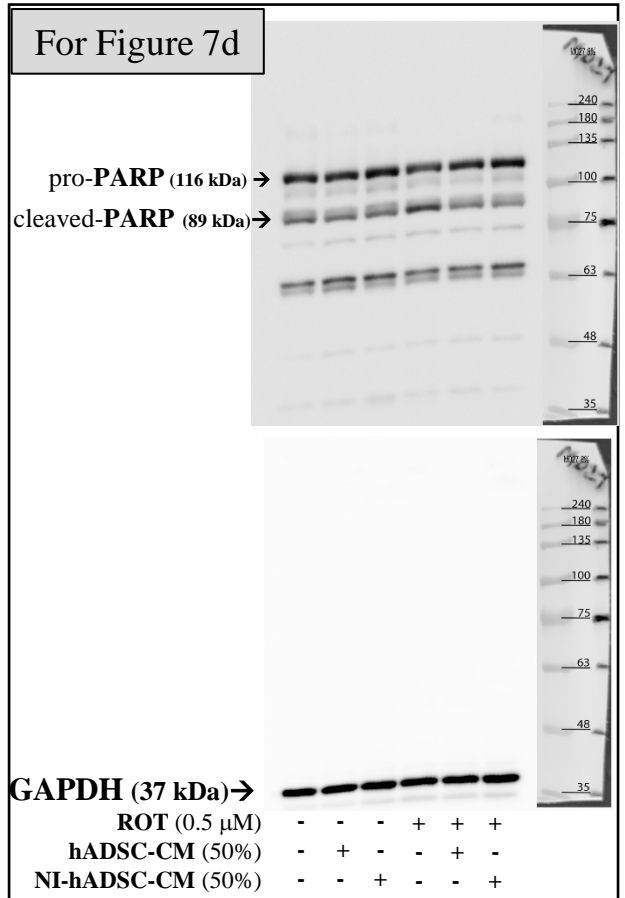

**Supplementary Figure 10.** Unedited images and their molecular weight markers for respective Western blots used in Figure 7 of this manuscript.
